# Supplementary material
Source: MDPI journal article supplement (https://www.mdpi.com/1424-8247/14/7/636)
Supplement: s1 [file s1]

# Evidence of pyrimethamine and cycloguanil analogues as dual inhibitors of *Trypanosoma brucei* pteridine reductase and dihydrofolate reductase

Giusy Tassone<sup>1#</sup>, Giacomo Landi<sup>1#</sup>, Pasquale Linciano<sup>2#</sup>, Valeria Francesconi<sup>3</sup>, Michele Tonelli<sup>3</sup>, Lorenzo Tagliazucchi<sup>2</sup>, Maria Paola Costi<sup>2</sup>, Stefano Mangani<sup>1</sup>, Cecilia Pozzi<sup>1</sup>

- <sup>1</sup> Department of Biotechnology, Chemistry and Pharmacy – Department of Excellence 2018-2020, University of Siena, via Aldo Moro 2, 53100 Siena, Italy; [giusy.tassone@unisi.it](mailto:giusy.tassone@unisi.it) (G.T.); [landi31@unisi.it](mailto:landi31@unisi.it) (G.L.); [pozzi4@unisi.it](mailto:pozzi4@unisi.it) (C.P.); [stefano.mangani@unisi.it](mailto:stefano.mangani@unisi.it) (S.M.)
- <sup>2</sup> Department of Life Science, University of Modena and Reggio Emilia, via Campi 103, 41125 Modena, Italy; [pasquale.linciano@unipv.it](mailto:pasquale.linciano@unipv.it) (P.L.); [mariapaola.costi@unimore.it](mailto:mariapaola.costi@unimore.it) (M.P.C.); [lorenzo.tagliazucchi@unimore.it](mailto:lorenzo.tagliazucchi@unimore.it) (L.T.)
- <sup>3</sup> Department of Pharmacy, University of Genoa, viale Benedetto XV n.3, 16132 Genoa, Italy; [francesconi.phd@difar.unige.it](mailto:francesconi.phd@difar.unige.it) (V.F.); [tonelli@difar.unige.it](mailto:tonelli@difar.unige.it) (M.T.)

## Contents

|           |    |
|-----------|----|
| Figure S1 | S2 |
| Figure S2 | S2 |
| Table S1  | S3 |
| Table S2  | S4 |

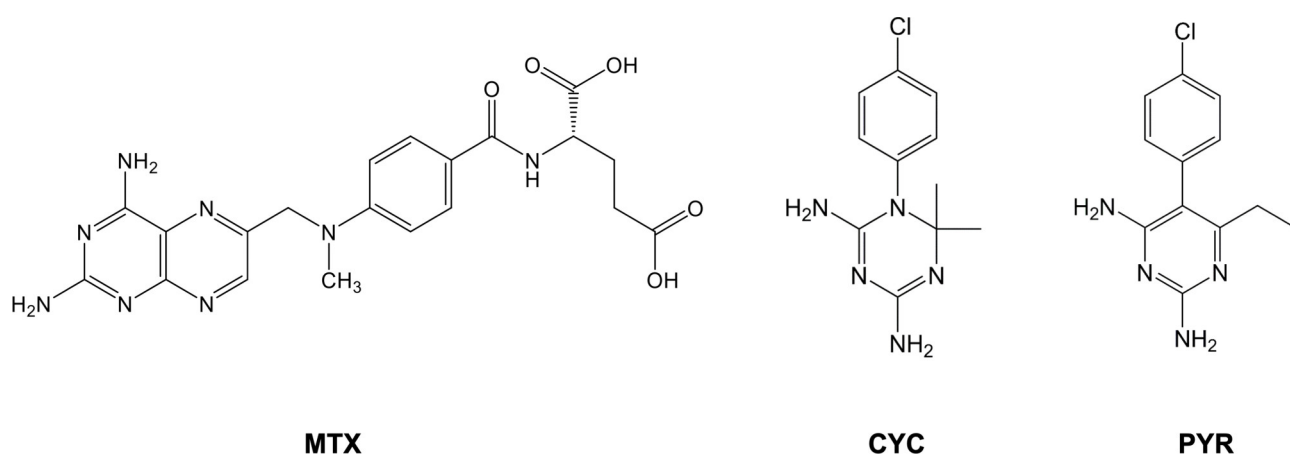

Figure S1. Chemical structures of methotrexate (MTX), cycloguanil (CYC), and pyrimethamine (PYR).

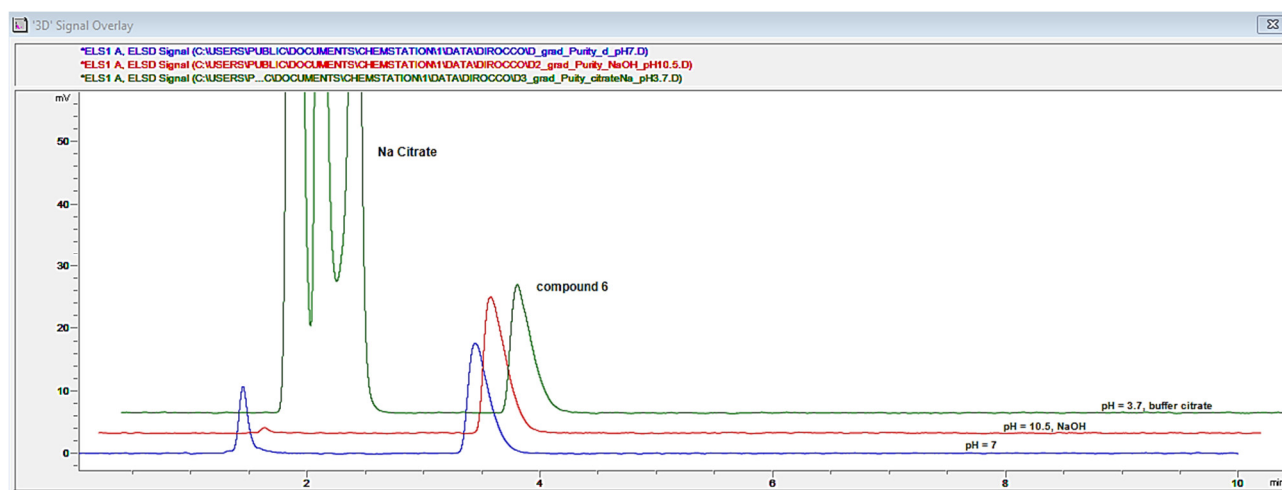

Figure S2. HPLC-ELSD chromatograms of *compound 6* after 30 h incubation in three different pH buffers.

Table S1. Data collection and refinement statistics. Values for the outer shell are given in parentheses.

| <i>TbPTR1:NADP(H):PYR</i>                                  |                             |
|------------------------------------------------------------|-----------------------------|
| DATA COLLECTION STATISTICS                                 |                             |
| PDB ID codes                                               | 7OPJ                        |
| Diffraction source                                         | I03 (DLS)                   |
| Wavelength (Å)                                             | 0.91840                     |
| Temperature (K)                                            | 100                         |
| Detector                                                   | Pilatus3 6M                 |
| Crystal-detector distance (mm)                             | 209.1                       |
| Rotation range per image (°)                               | 0.15                        |
| Exposure time per image (s)                                | 0.25                        |
| Space group                                                | P2 <sub>1</sub>             |
| No. of molecules/ASU                                       | 4 (one functional tetramer) |
| <i>a</i> , <i>b</i> , <i>c</i> (Å)                         | 74.90, 91.02, 82.80         |
| $\beta$ (°)                                                | 115.63                      |
| Resolution range (Å)                                       | 18.28 – 1.34 (1.41 – 1.34)  |
| Total no. of reflections                                   | 476448 (66781)              |
| No. of unique reflections                                  | 210248 (30679)              |
| Completeness (%)                                           | 93.9 (94.2)                 |
| Redundancy                                                 | 2.3 (2.2)                   |
| $\langle I/\sigma(I) \rangle$                              | 7.6 (2.3)                   |
| <i>R</i> <sub>meas</sub>                                   | 0.071 (0.440)               |
| Overall <i>B</i> factor from Wilson plot (Å <sup>2</sup> ) | 11.5                        |
| REFINEMENTS STATISTICS                                     |                             |
| Resolution range (Å)                                       | 18.07 – 1.34 (1.38 – 1.34)  |
| No. of reflections, working set                            | 199465 (14665)              |
| No. of reflections, test set                               | 10516 (790)                 |
| Final <i>R</i> <sub>cryst</sub>                            | 0.130 (0.231)               |
| Final <i>R</i> <sub>free</sub>                             | 0.174 (0.275)               |
| No. of non-H atoms                                         |                             |
| Protein                                                    | 7540                        |
| PYR                                                        | 68                          |
| NADP(H)                                                    | 192                         |
| Others (acetate, glycerol)                                 | 22 (16, 6)                  |
| Water                                                      | 1025                        |
| Total                                                      | 8847                        |
| R.m.s. deviations                                          |                             |
| Bonds (Å)                                                  | 0.015                       |
| Angles (°)                                                 | 2.076                       |
| Average <i>B</i> factors (Å <sup>2</sup> )                 | 18.9                        |
| Estimate error on coordinates based on <i>R</i> value (Å)  | 0.049                       |
| Ramachandran plot                                          |                             |
| Most favored (%)                                           | 96.0                        |
| Allowed (%)                                                | 4.0                         |
| RSCC PYR (chain A, B, C, D)                                | 0.96; 0.96; 0.80; 0.96      |

Table S2. Calculated %CV for ELDS areas of *compound 6* (mV\*s).

|                      | Response   |       |                        |       | Standard deviation | CV % |
|----------------------|------------|-------|------------------------|-------|--------------------|------|
| SAMPLE               | Area day 1 |       | Area day 2 (after 30h) |       |                    |      |
| Compound 6_water     | 297.1      | 288.6 | 294.0                  | 279.8 | 7.58               | 2.61 |
| Compound 6_CitrateNa | 281.7      | 274.3 | 288.7                  | 271.3 | 7.81               | 2.80 |
| Compound 6_alkaline  | 291.5      | 299.5 | 293.1                  | 297.4 | 3.71               | 1.26 |
